# Supplementary material for: Bayesian analysis of retinotopic maps
Source: eLife journal article supplement (doi:10.7554/elife.40224), 2018-12-06

A. HCP Subject 198653

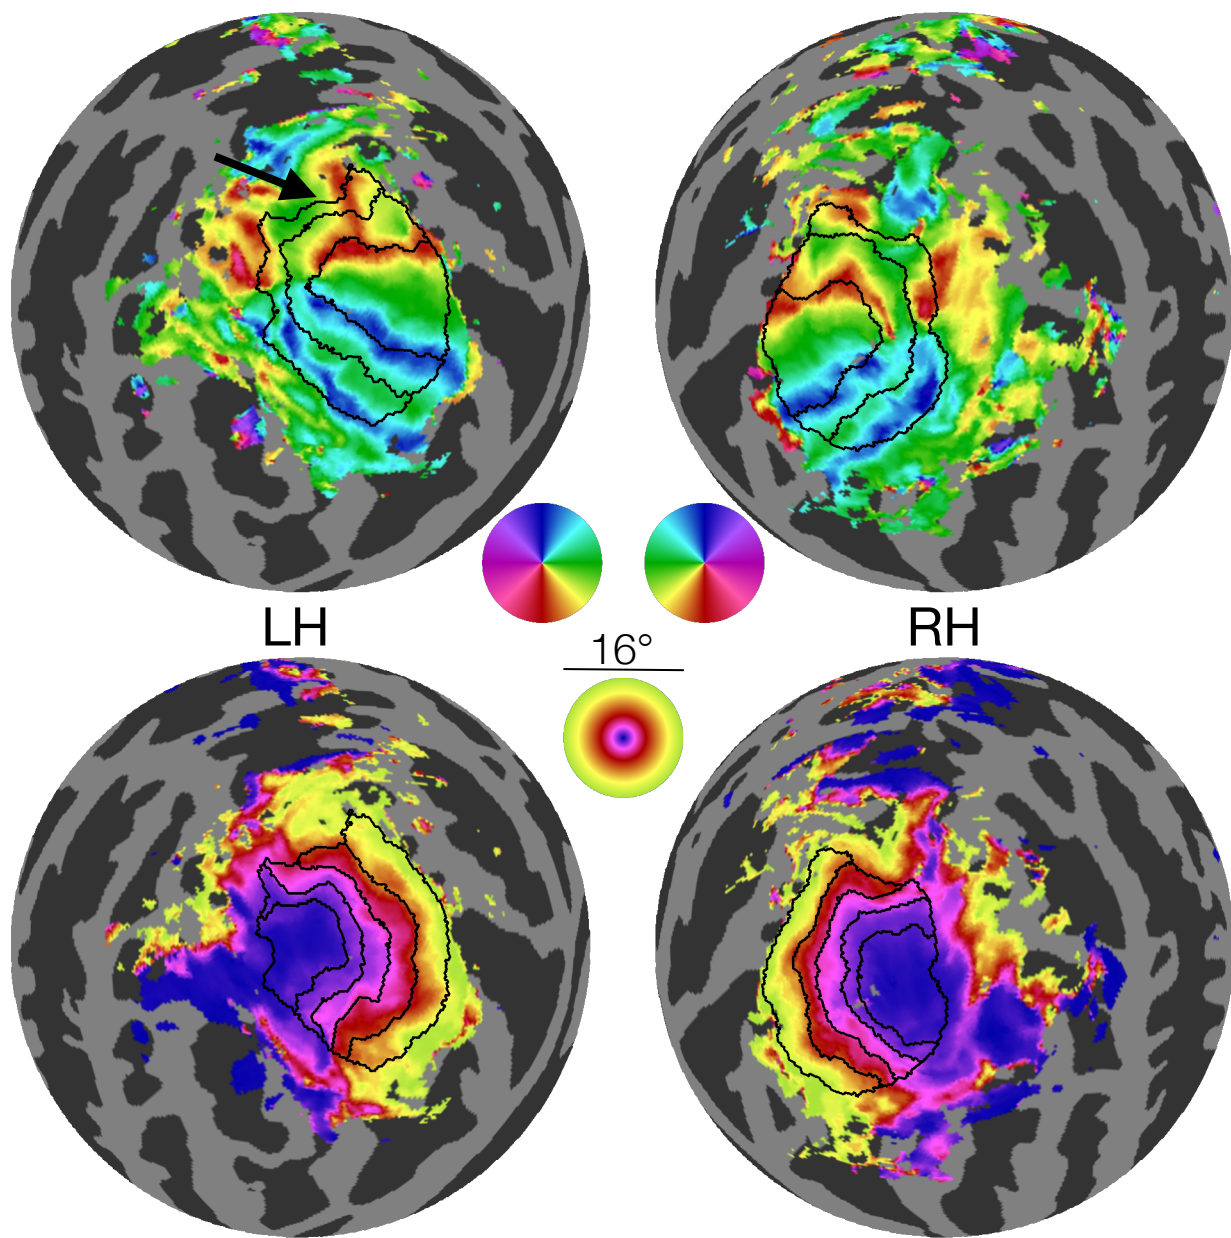

B. HCP Subject 644246

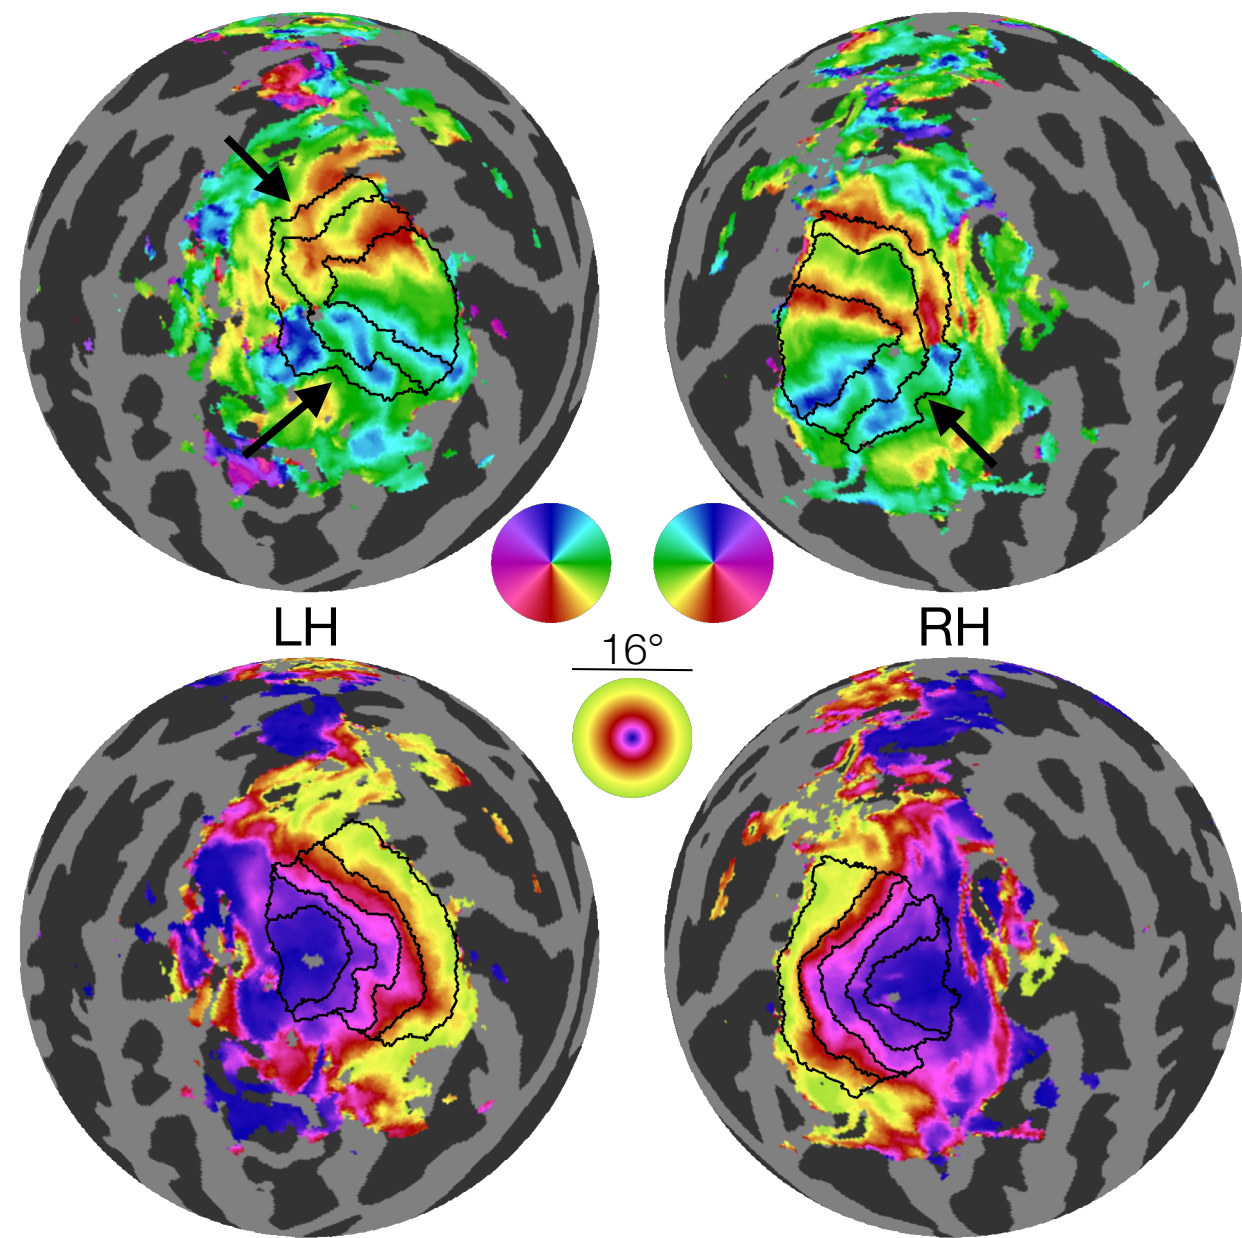

Supplement: supp [file elife-40224-supp-v1.zip]
