# Supplementary material for: Bayesian analysis of retinotopic maps
Source: eLife journal article supplement (doi:10.7554/elife.40224), 2018-12-06
Supplement: supp [file elife-40224-supp-v1.zip]

Archive with 6 entries (6 files):
- elife_poa_e40224_Supplementary_File_4.pdf
- elife_poa_e40224_Supplementary_File_1.pdf
- elife_poa_e40224_Transparent_Reporting_File.pdf
- elife_poa_e40224_Supplementary_File_3.pdf
- elife_poa_e40224_Supplementary_File_2.pdf
- elife_poa_e40224_Supplementary_File_5.pdf
