# Supplementary material for: Bayesian analysis of retinotopic maps
Source: eLife journal article supplement (doi:10.7554/elife.40224), 2018-12-06
Supplement: supp [file elife-40224-supp-v1.zip › elife_poa_e40224_Supplementary_File_1.pdf]

# All Retinotopy

12 scans  
3.2 minutes each

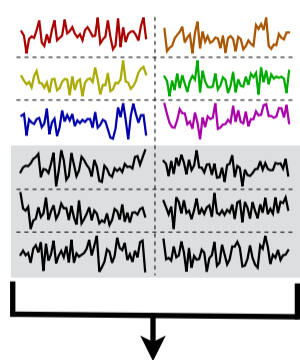

## Validation Dataset

6 scans, 30 min. (×1)

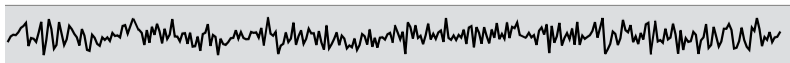

# Training Datasets

1 scan (×6)  
3.2 min/set

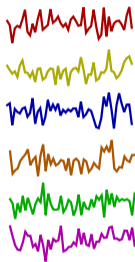

2 scans (×5)  
6.4 min/set

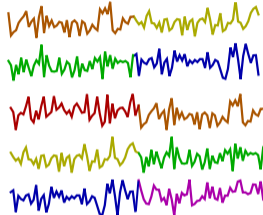

3 scans (×4)  
9.6 min/set

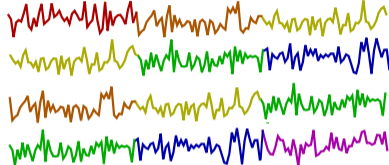

4 scans, 12.8 min. each (×3)

5 scans, 16 min. each (×2)

6 scans, 19.2 min. each (×1)

...
