# Supplementary material for: Bayesian analysis of retinotopic maps
Source: eLife journal article supplement (doi:10.7554/elife.40224), 2018-12-06

## A. Group-average Retinotopic Maps

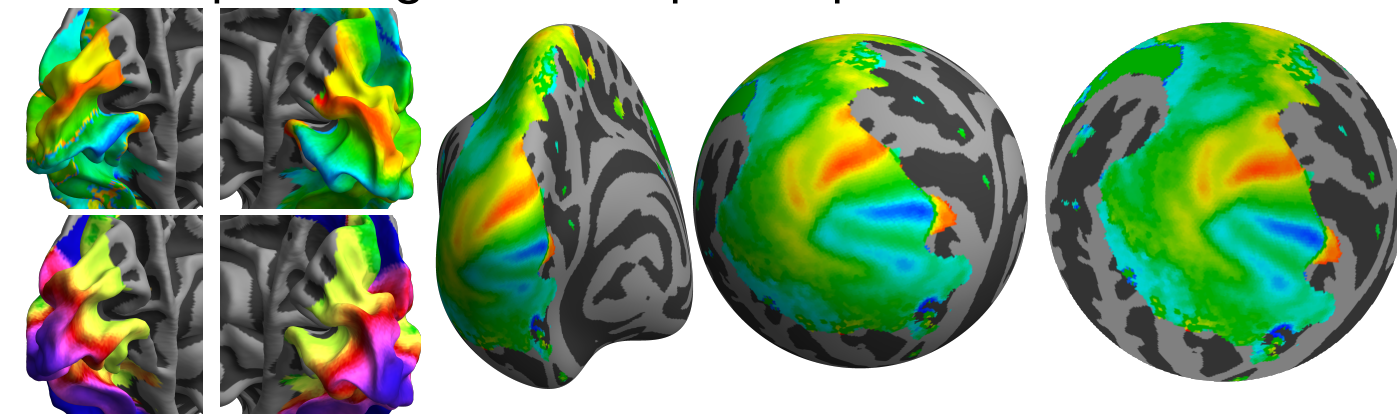

## B. Model of Retinotopy

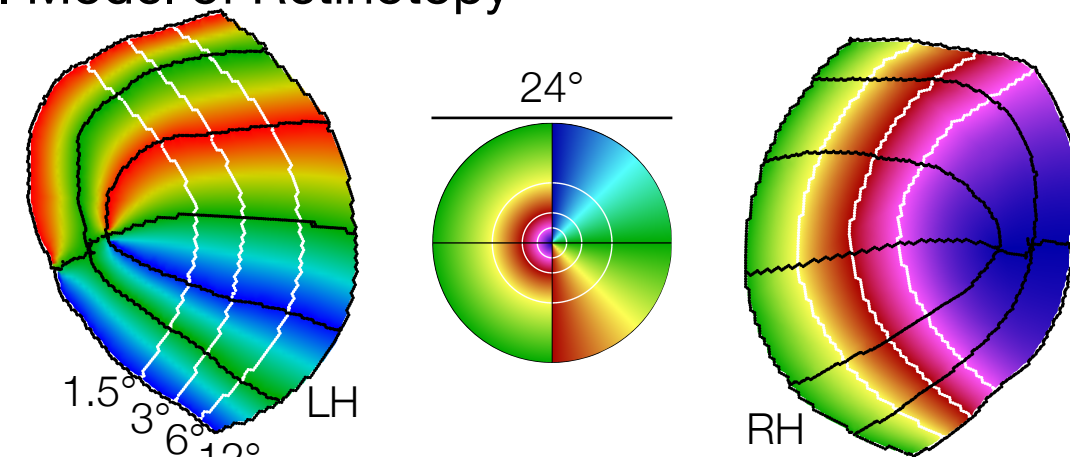

## C. Calculation of the Anatomically-defined Atlas of Retinotopy

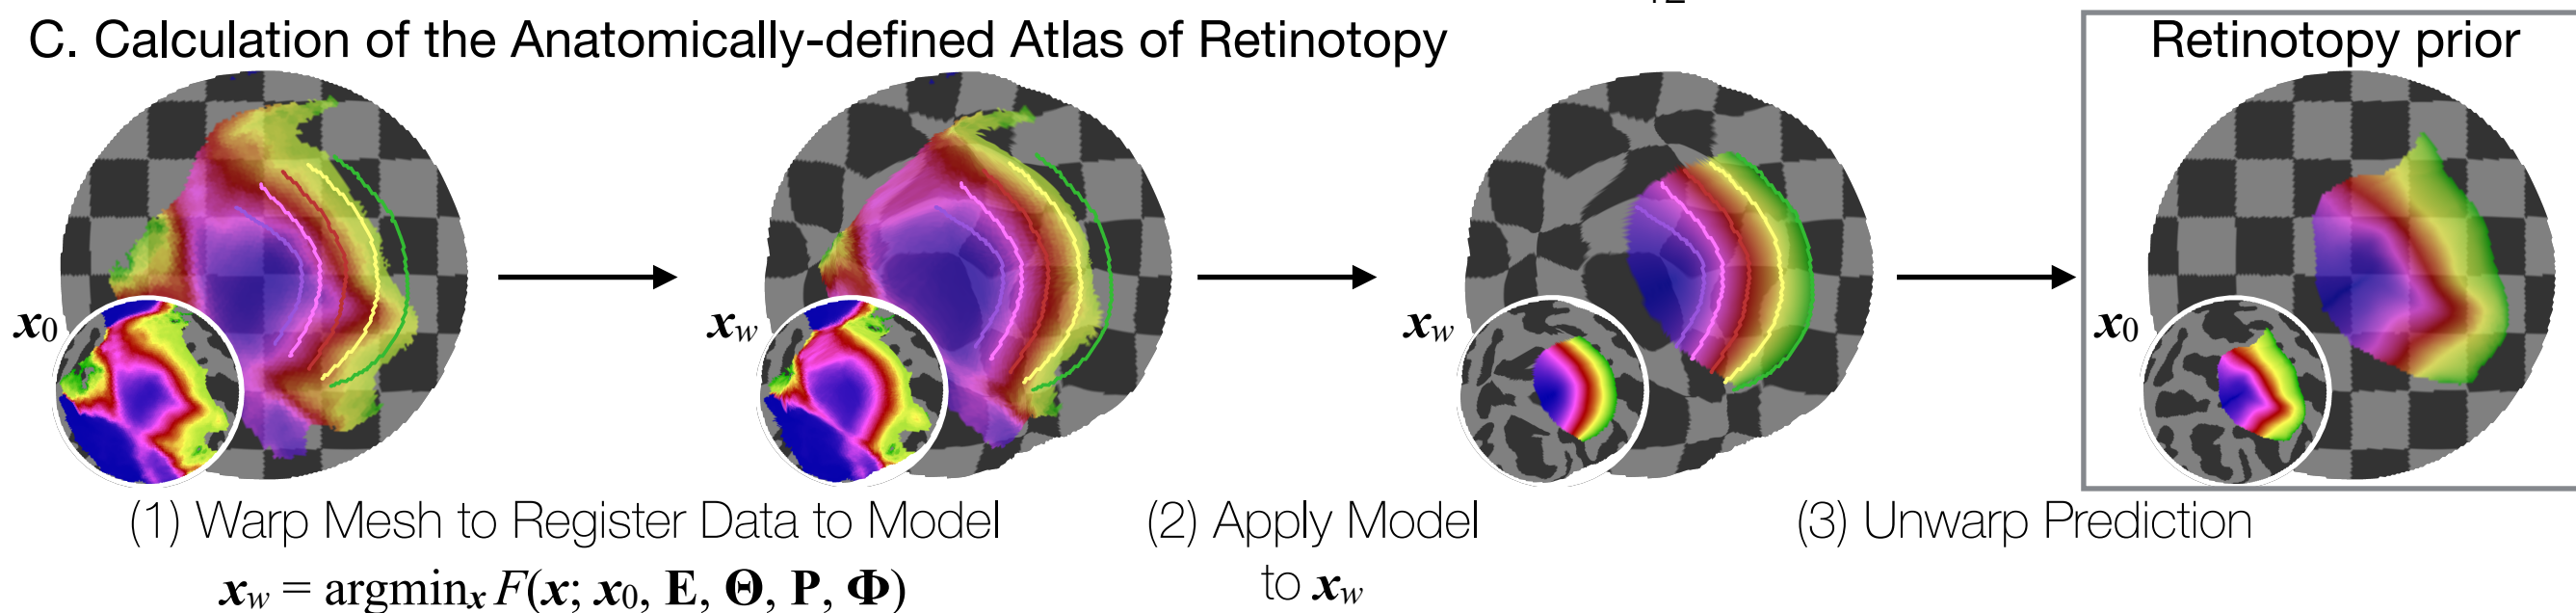

## D. Visual Area Boundaries

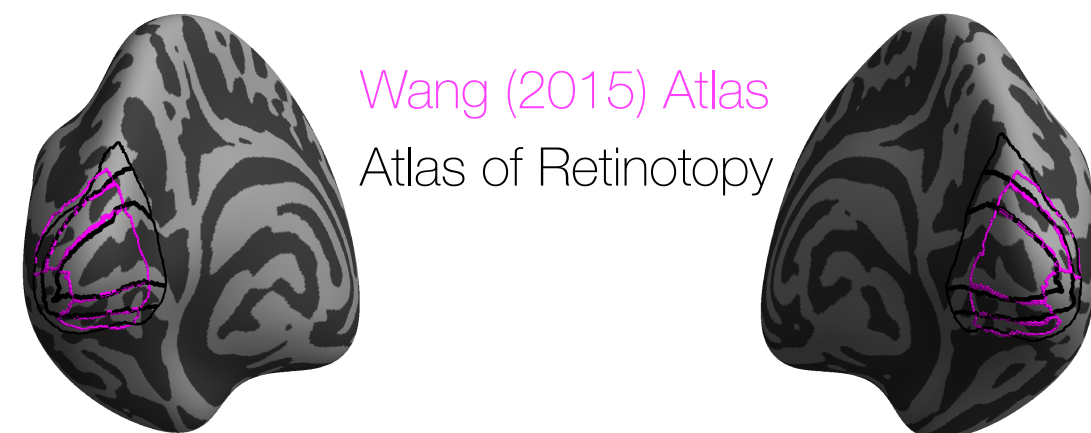

Wang (2015) Atlas  
Atlas of Retinotopy

## E. Isomorphic Representations of V1-V3

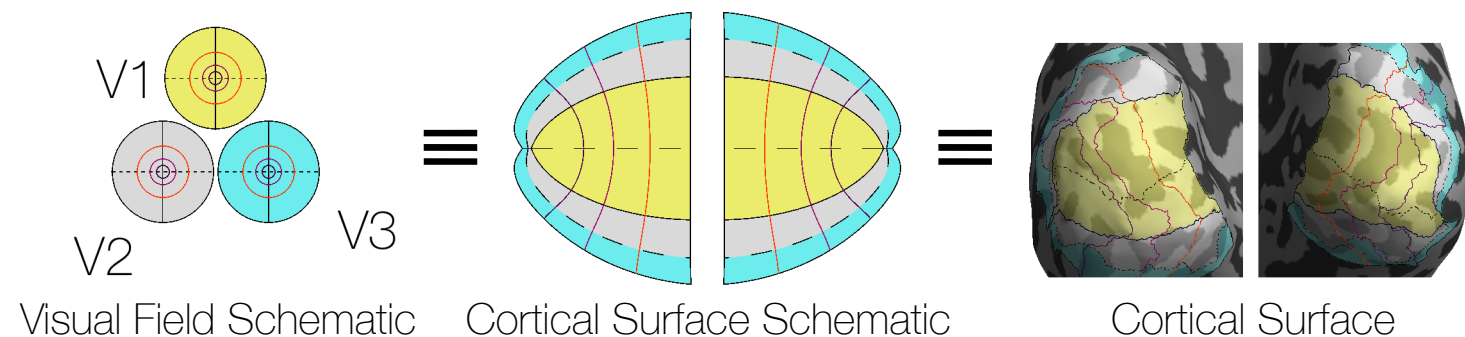

Supplement: supp [file elife-40224-supp-v1.zip › elife_poa_e40224_Supplementary_File_2.pdf]
