# Supplementary figures and images for: Bayesian analysis of retinotopic maps
Source: eLife journal article supplement (doi:10.7554/elife.40224), 2018-12-06

Mean Warp Field

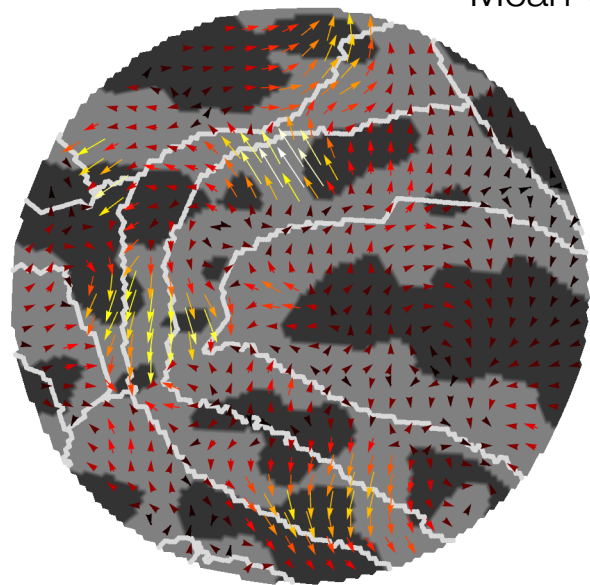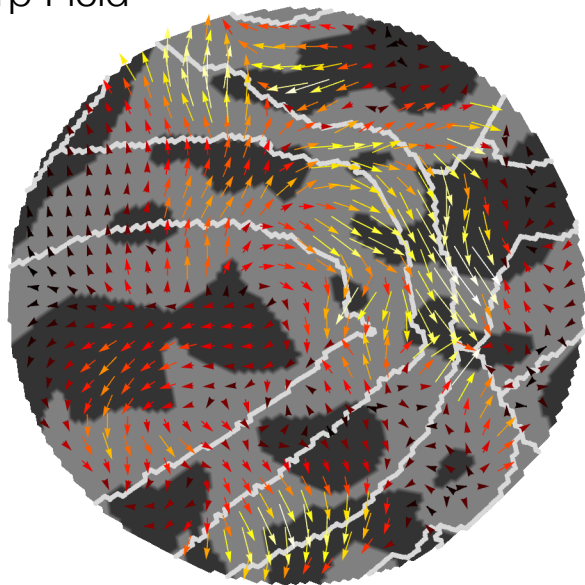

Principal Component 1

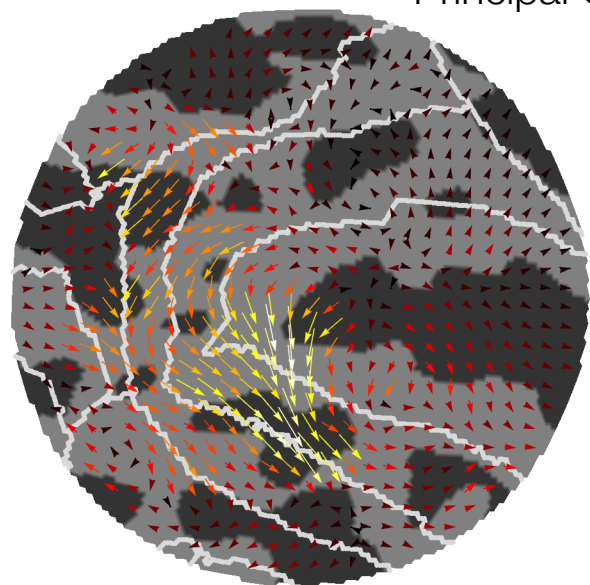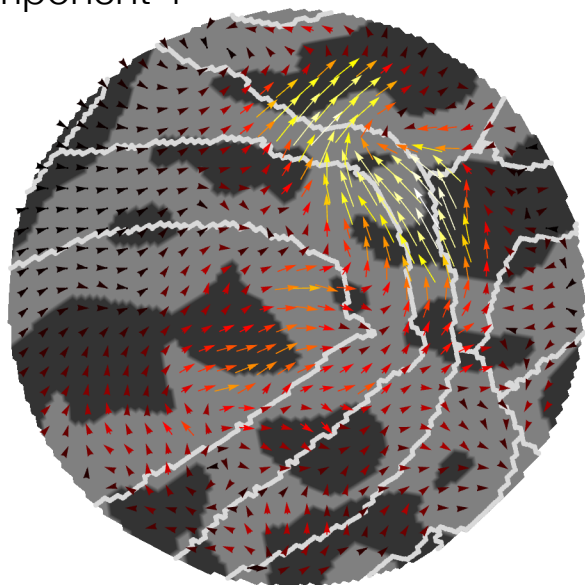

Principal Component 2

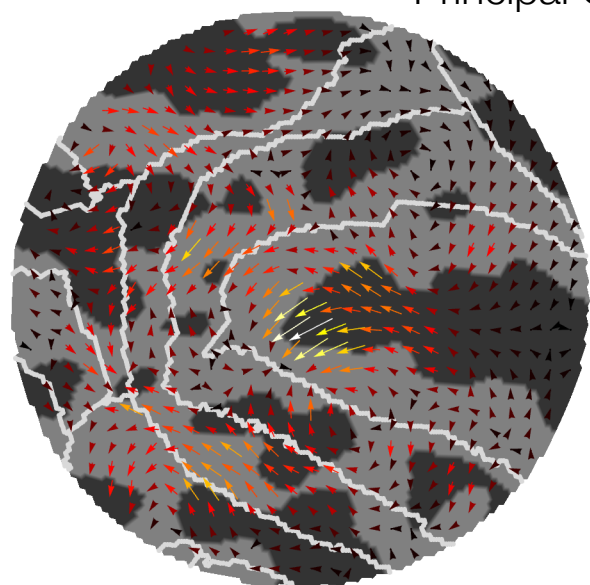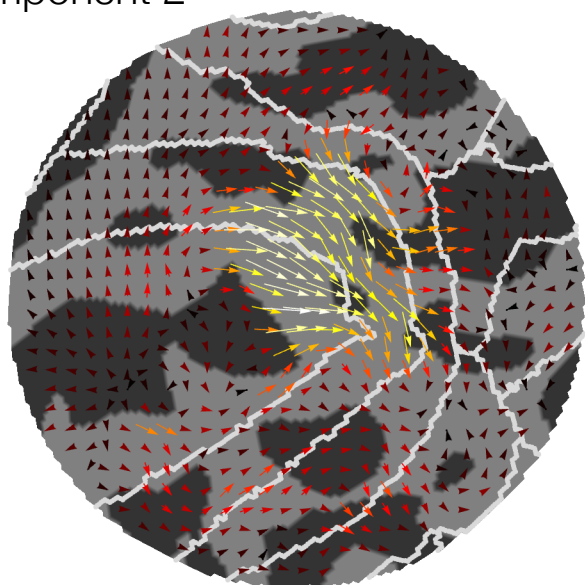

Principal Component 3

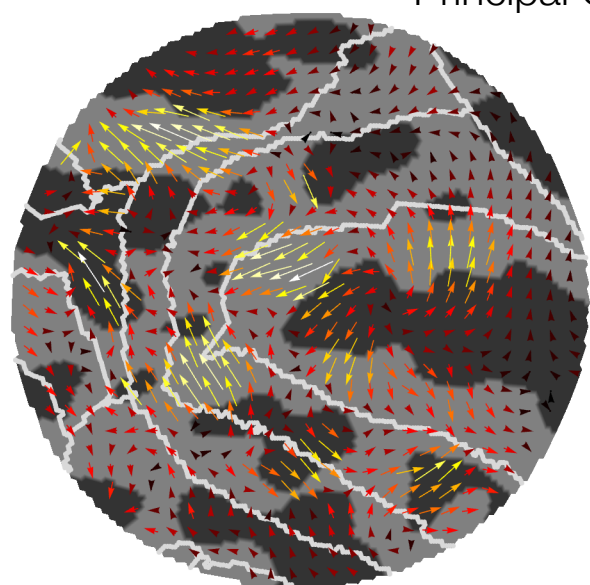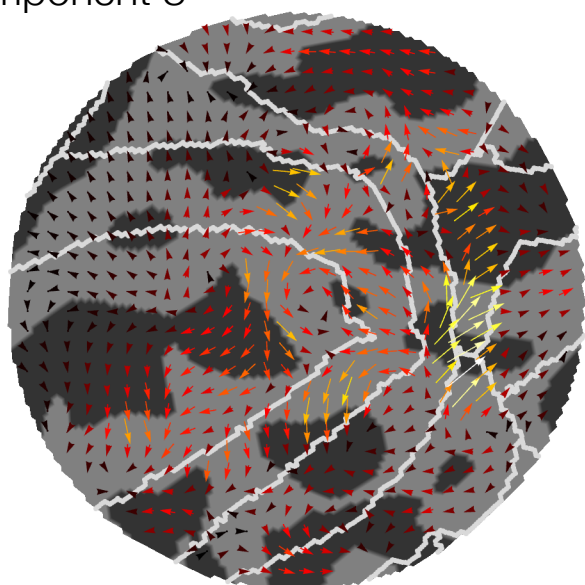

Supplement: supp [file elife-40224-supp-v1.zip › elife_poa_e40224_Supplementary_File_4.pdf]

A. 181 Subject Group-Average Retinotopic Maps

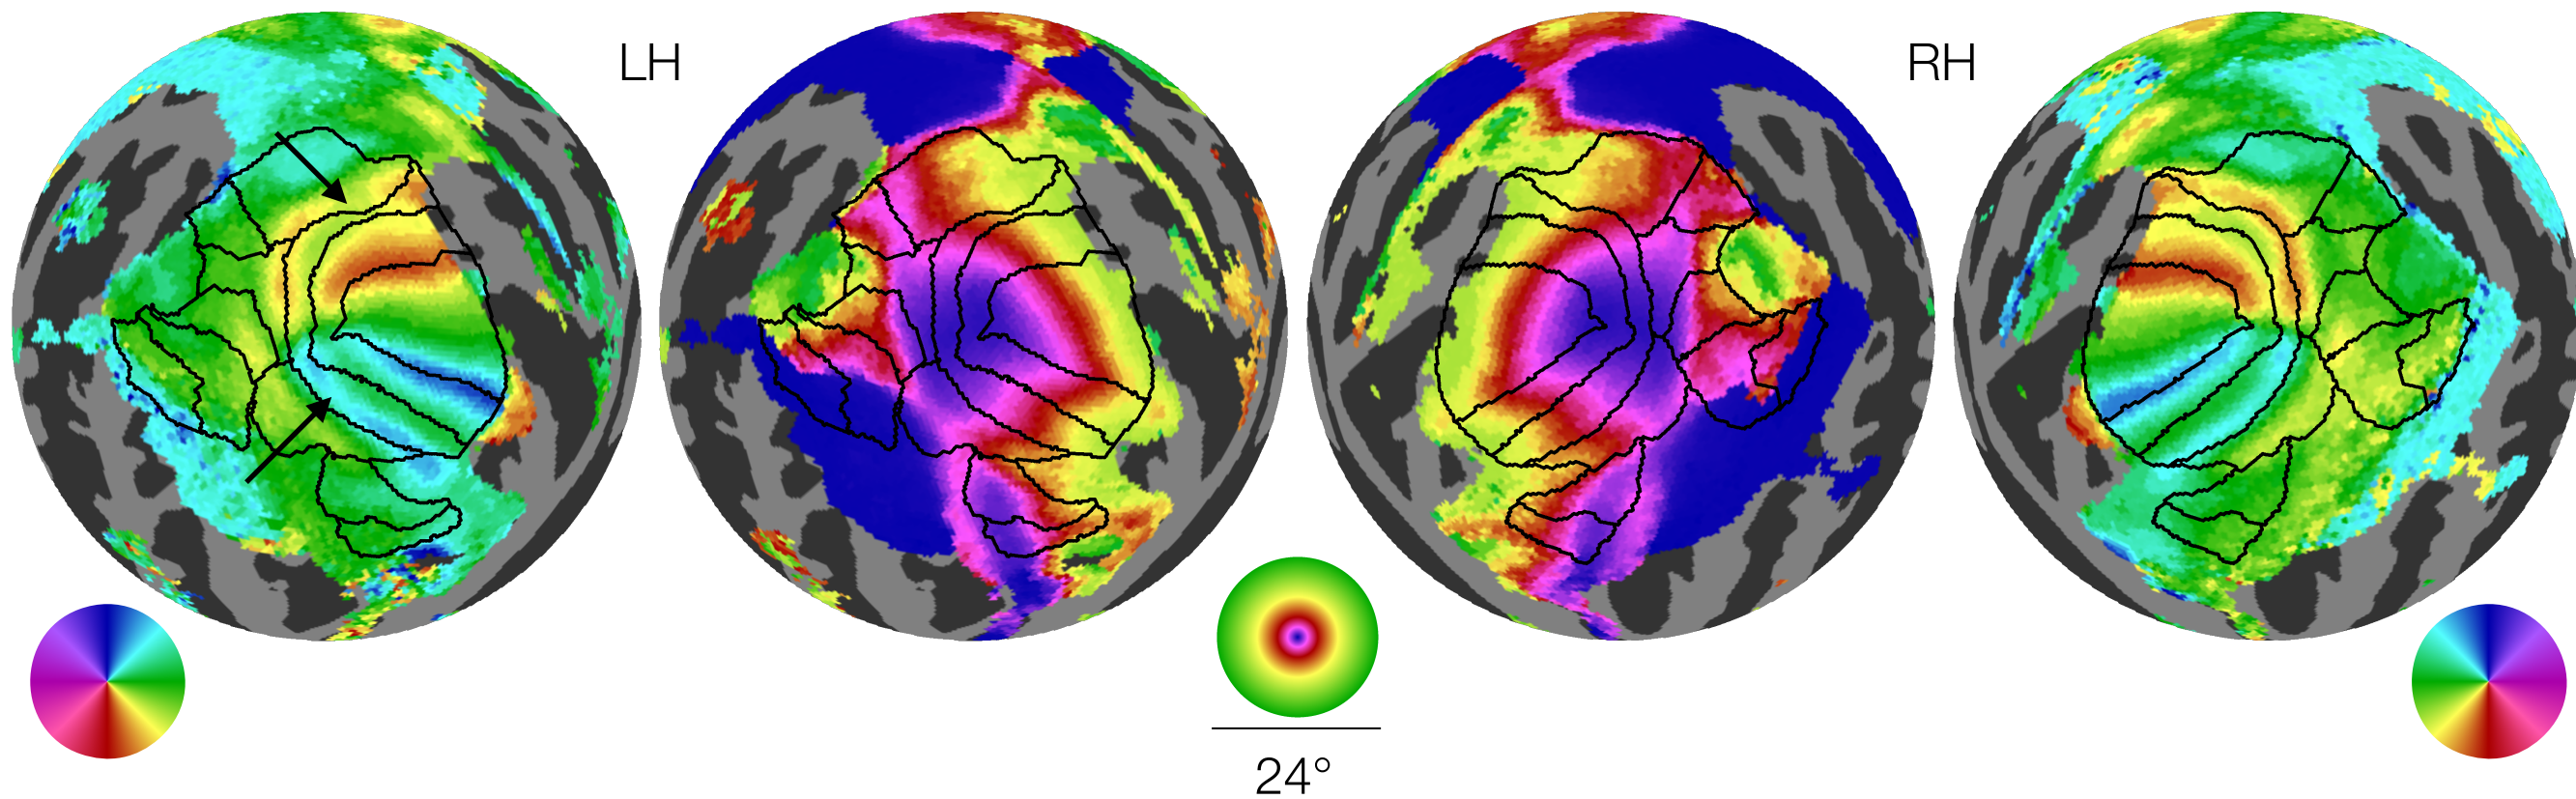

B. 181 Subject Group-Average Retinotopic Maps

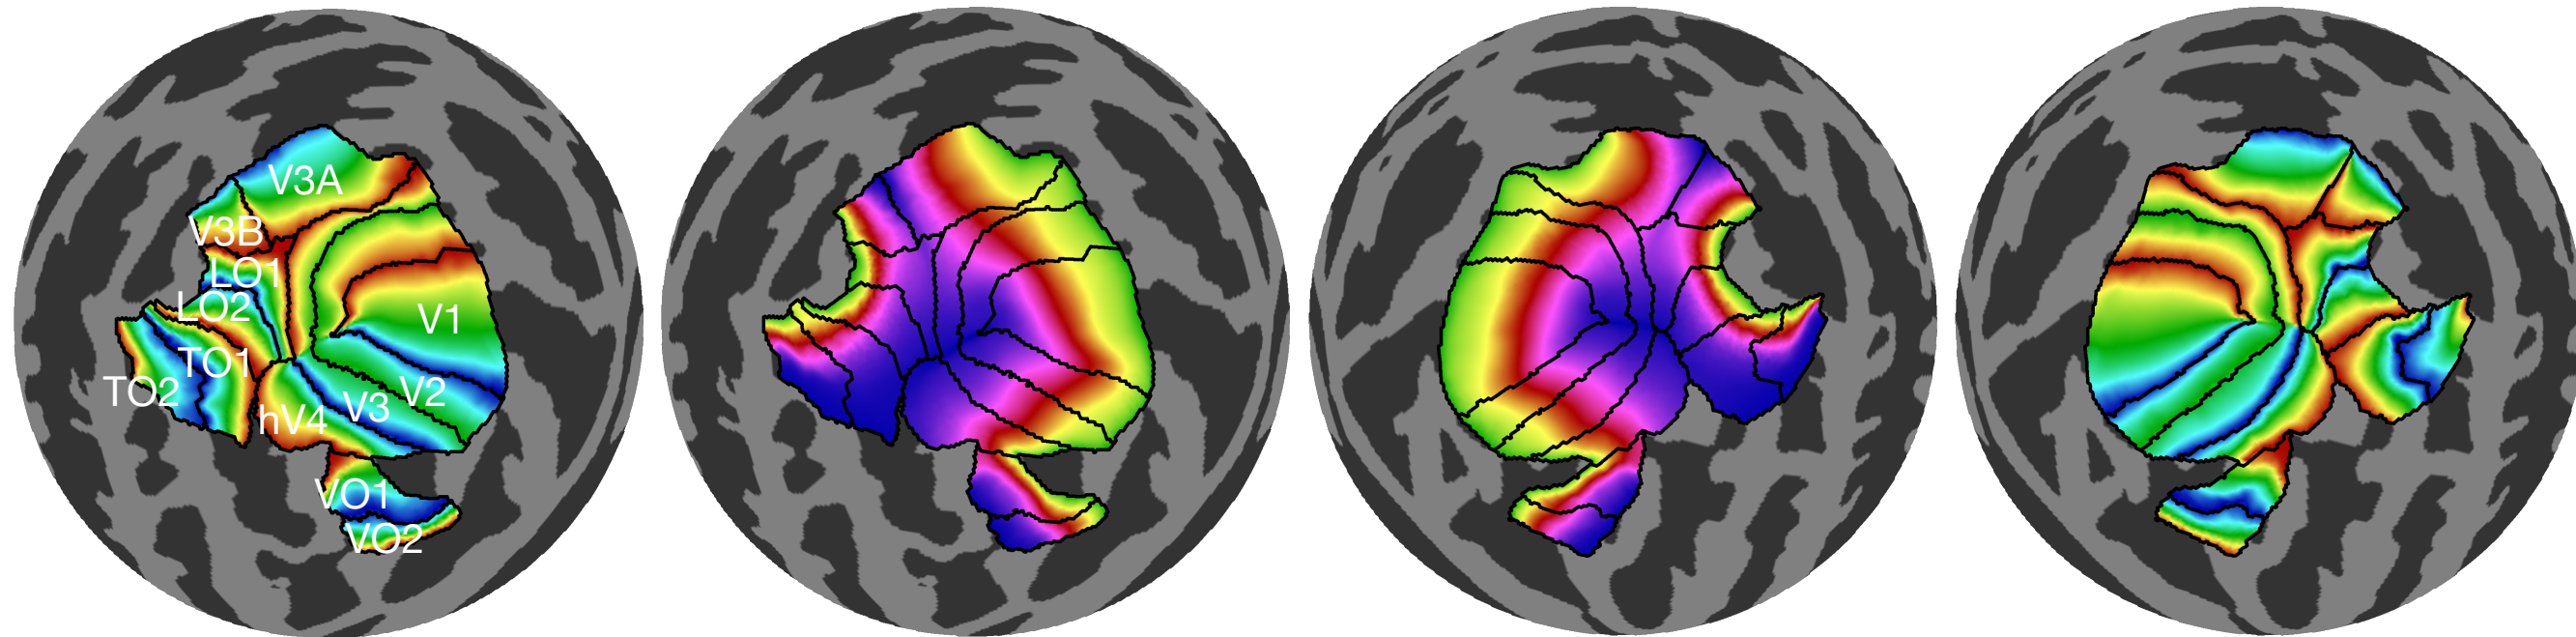

Supplement: supp [file elife-40224-supp-v1.zip › elife_poa_e40224_Supplementary_File_3.pdf]

A. HCP Subject 198653

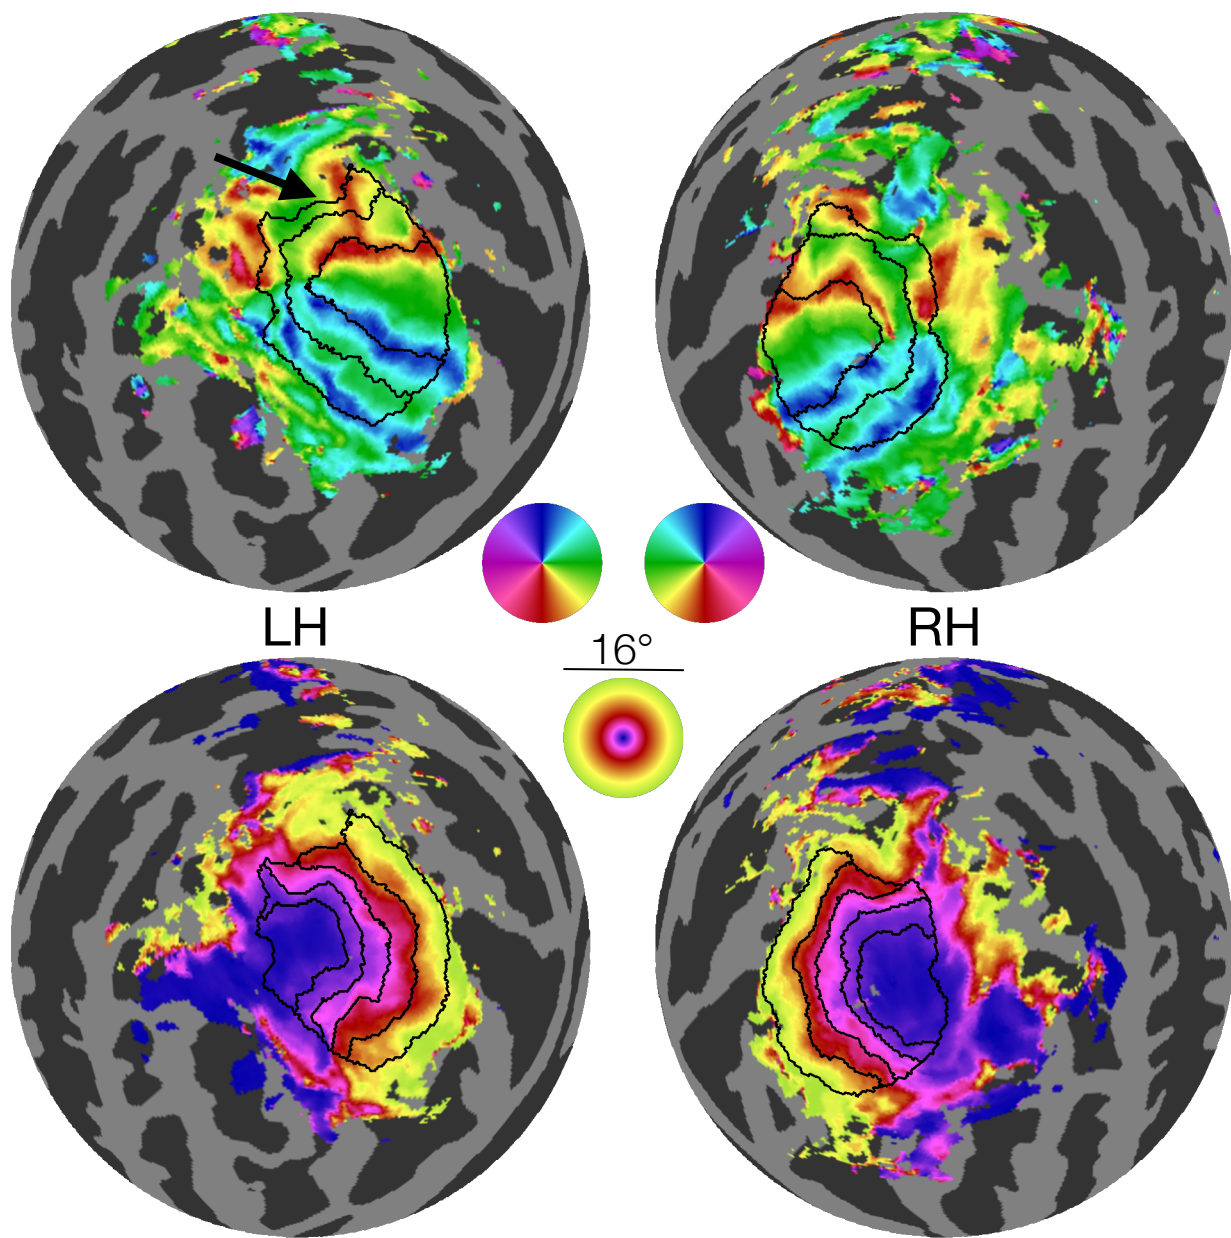

B. HCP Subject 644246

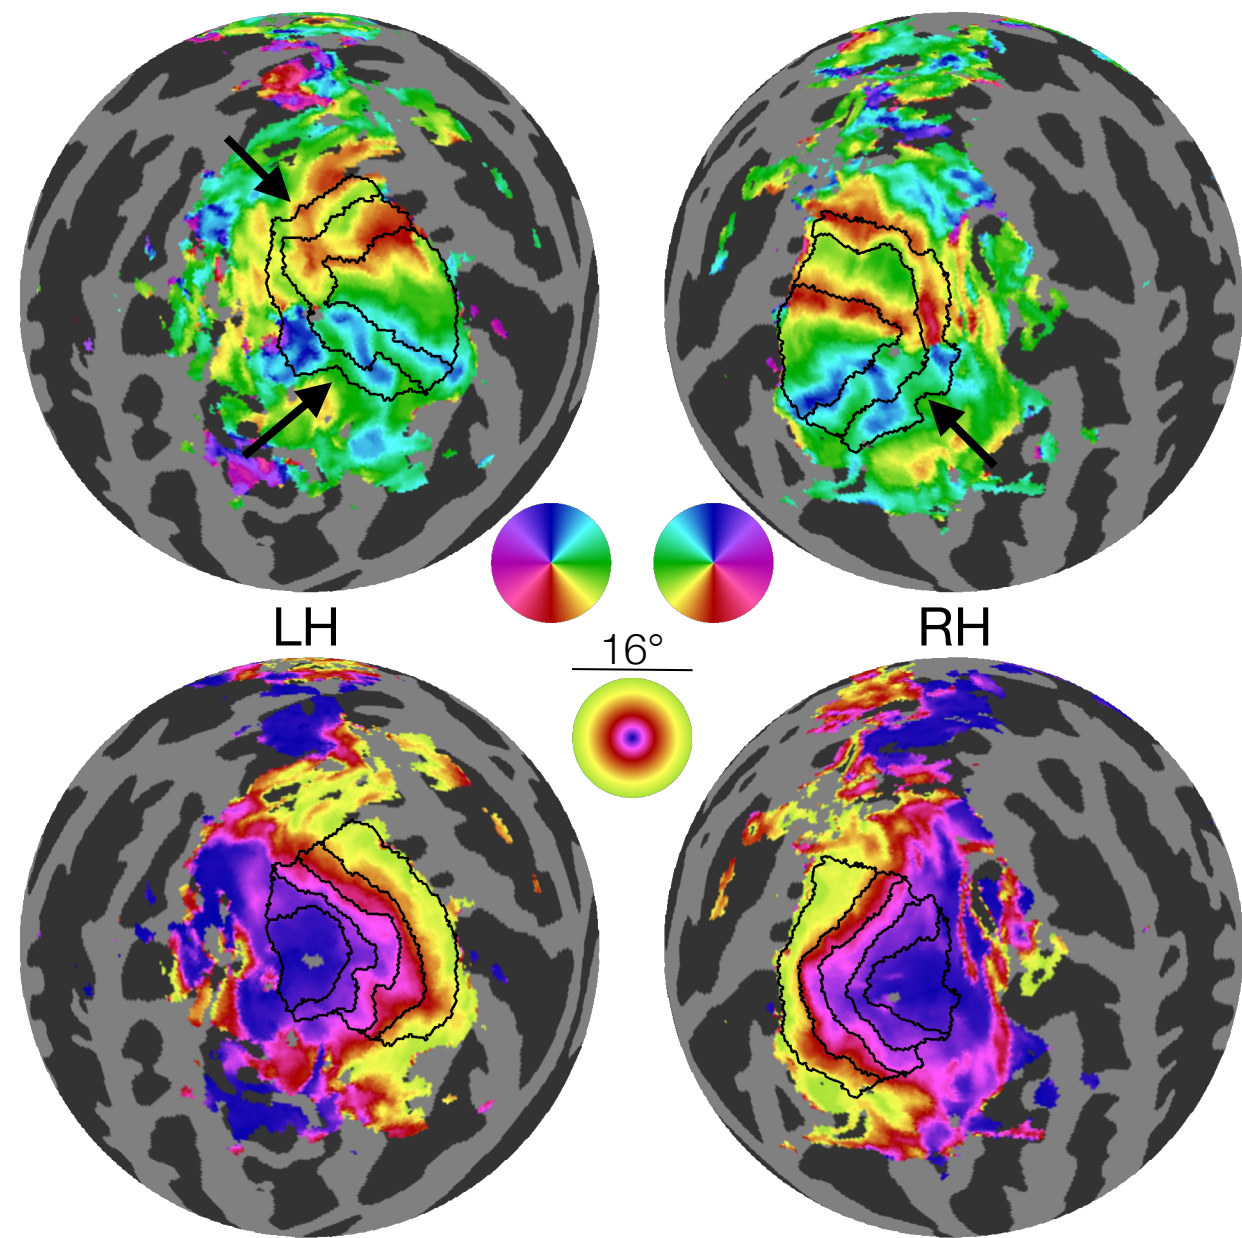

Supplement: supp [file elife-40224-supp-v1.zip › elife_poa_e40224_Supplementary_File_5.pdf]
